# Supplementary material for: Pressure mediated phase transition and dihydrogen bonding formation in trimethylamine borane
Source: Royal Society of Chemistry journal article supplement (doi:10.1039/d4tc02285h), 2024-01-01
Supplement: d4tc02285h1.pdf [file d4tc02285h1.pdf]

SUPPORTING INFORMATION

**Pressure Mediated Phase Transition and Dihydrogen Bonding Formation in Trimethylamine Borane**

Rongfeng Guan,<sup>ab</sup> Jingyan Liu,<sup>a</sup> Aditya Kutty,<sup>a</sup> Zhihao Yu,<sup>a</sup> Yujin Ji,<sup>b</sup> Youyong Li,<sup>\*bc</sup> and Yang Song<sup>\*ac</sup>

<sup>a</sup>*Department of Chemistry, The University of Western Ontario, London, Ontario, N6A 5B7, Canada*

<sup>b</sup>*Institute of Functional Nano & Soft Materials (FUNSOM), Jiangsu Key Laboratory for Carbon-Based Functional Materials and Devices, Soochow University, Suzhou 215123, Jiangsu, China*

<sup>c</sup>*Soochow University – Western University Centre for Synchrotron Radiation Research, The University of Western Ontario, London, ON N6A 5B7, Canada*

**Contents**

Fig. S1 Unit cell parameters as a function of pressure of TMAB

Fig. S2 Experimental and simulated XRD patterns of the  $P3_1$  structures of TMAB at 9.15 GPa obtained by the Rietveld refinement method.

Fig. S3 The comparison between simulated and experimental IR spectra of the  $P3_1$  (A) structure of TMAB at 9 GPa.

Fig. S4 The comparison between simulated and experimental Raman spectra of the  $P3_1$  (A) structure of TMAB at 9 GPa.

Table S1 Partial assignments and vibrational frequencies ( $\text{cm}^{-1}$ ) of TMAB at ambient pressure.

Table S2 Pressure dependence of the selected IR modes of TMAB on compression.

Table S3 Pressure dependence of the selected Raman modes of TMAB on compression.

Table S4 Cell parameters and Wyckoff positions for the unit cells of the top-ranked candidate structures of TMAB optimized at ambient pressure.

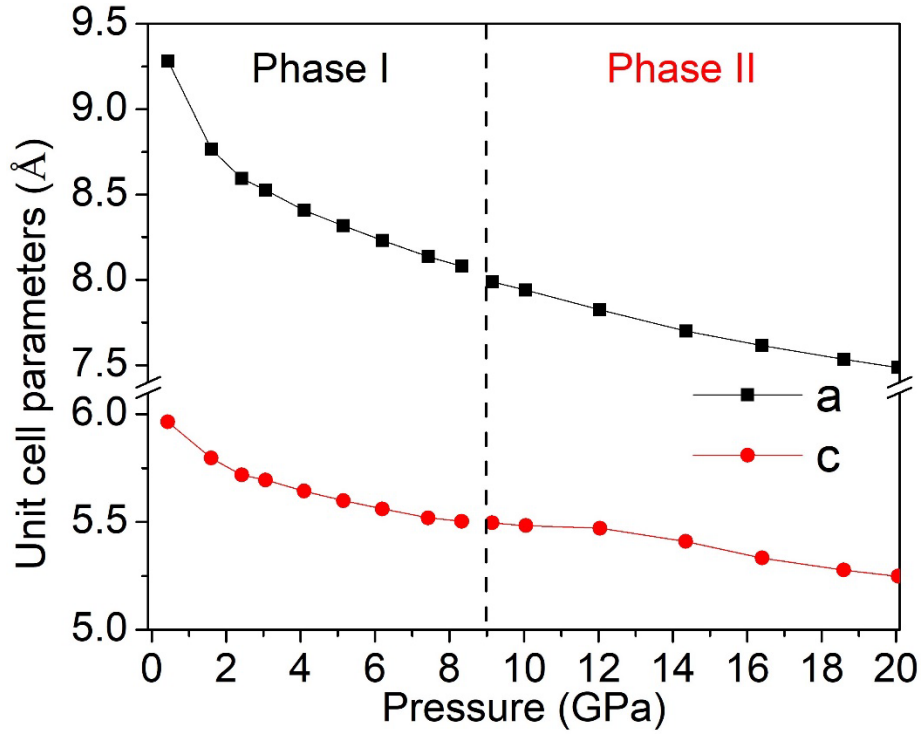

**Fig. S1** Unit cell parameters as a function of pressure of TMAB.

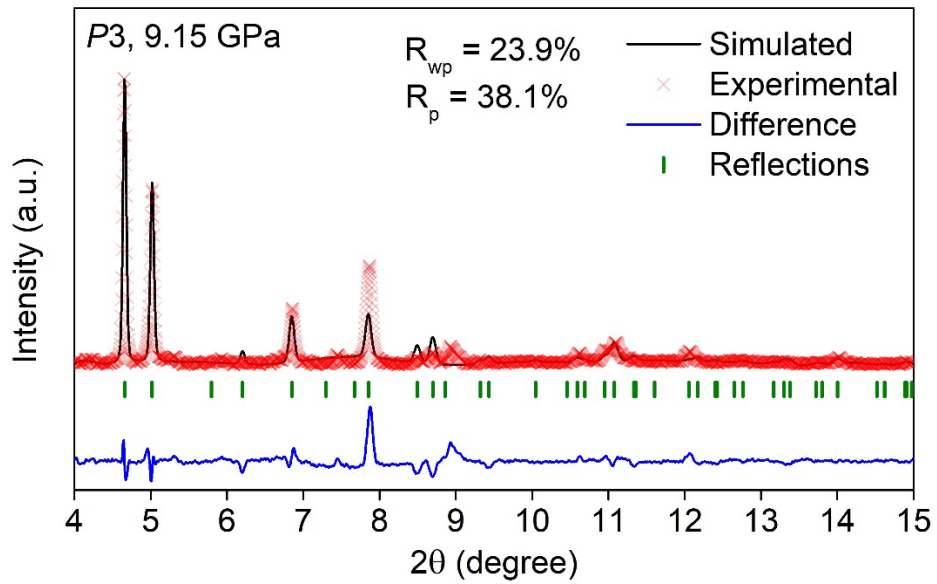

**Fig. S2** Experimental and simulated XRD patterns of the *P3* structures of TMAB at 9.15 GPa obtained by the Rietveld refinement method.

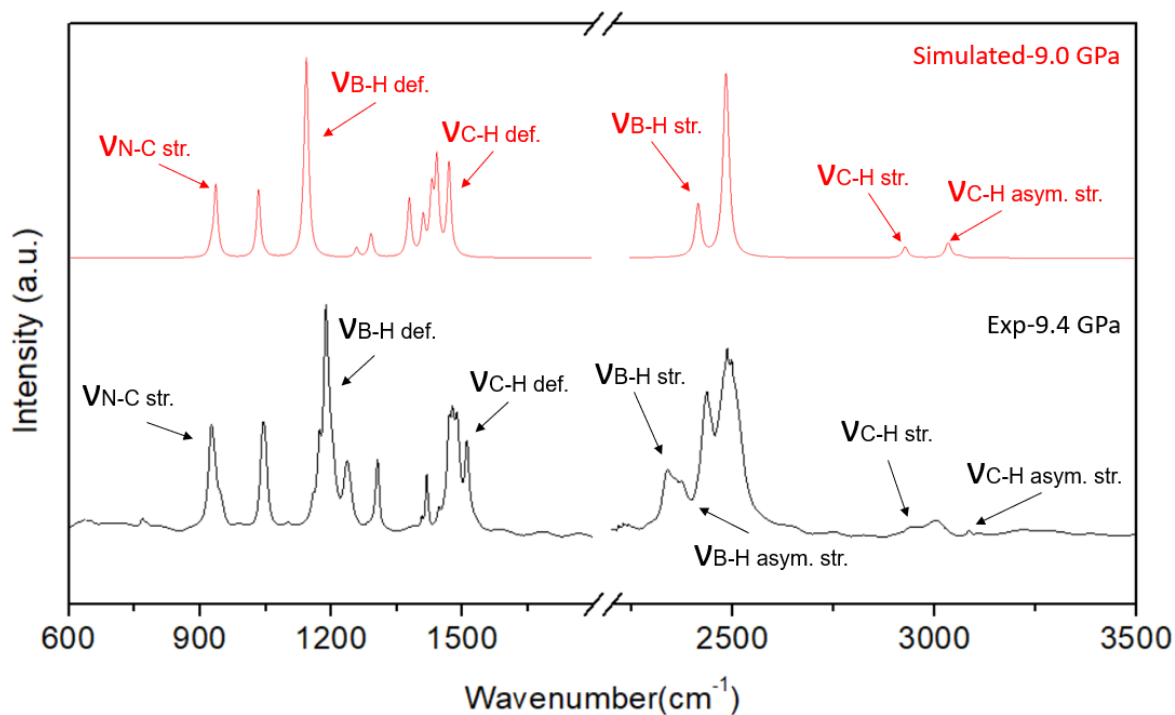

**Fig. S3** The comparison between simulated and experimental IR spectra of the  $P3_1$  (A) structure of TMAB at 9 GPa.

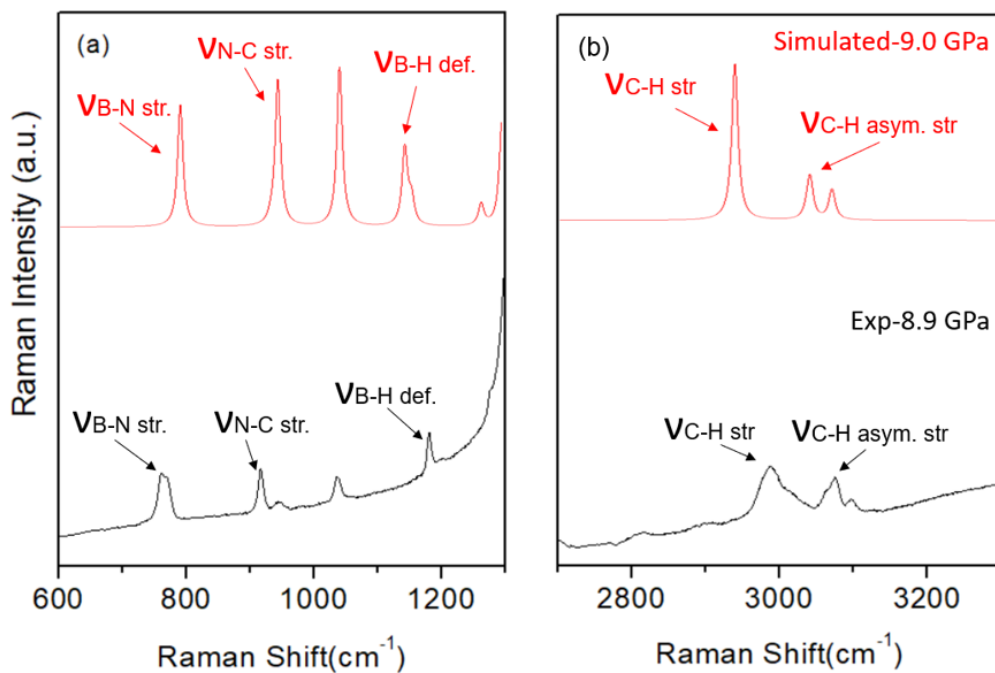

**Fig. S4** The comparison between simulated and experimental Raman spectra of  $P3_1$  (A) structure of TMAB at 9 GPa.

**Table S1** Partial assignments and vibrational frequencies ( $\text{cm}^{-1}$ ) of TMAB at ambient pressure.

| Description          | This work |      | Durig <i>et al.</i> <sup>50</sup> |      |
|----------------------|-----------|------|-----------------------------------|------|
|                      | Raman     | IR   | Raman                             | IR   |
| asym. C–H stretching | 3025      | 3019 | 3019                              | 3018 |
|                      | 3013      | 3003 | 3004                              | 3002 |
| sym. C–H stretching  | 2961      | 2952 | 2953                              | 2954 |
| asym. B–H stretching | 2377      | 2371 | 2373                              | 2360 |
| sym. B–H stretching  | 2270      | 2263 | 2266                              | 2264 |
| B–H deformation      | 1174      | 1168 | 1168                              | 1168 |
| C–H deformation      | 1468      | 1474 | 1475                              | 1473 |
| B–N stretching       | 691       | –    | 680                               | 680  |
| N–C stretching       | 865       | 856  | 860                               | 859  |

**Table S2** Pressure dependence of the selected IR modes of TMAB on compression <sup>a</sup>.

| Assignment       | Frequency (cm <sup>-1</sup> ) | dν/dP (cm <sup>-1</sup> ·GPa <sup>-1</sup> ) |                        |
|------------------|-------------------------------|----------------------------------------------|------------------------|
|                  |                               | Phase I<br>(0–9.4 GPa)                       | Phase II<br>(>9.4 GPa) |
| ν B-H def.       | 1168.6                        | 2.23                                         | 1.43                   |
| ν C-H def.       | 1446.5                        | 4.56                                         | 1.35                   |
| ν C-H def.       | 1474.3                        | 4.28                                         | –                      |
| ν B-H str.       | 2315.8                        | 6.19                                         | –                      |
| ν B-H str.       | 2370.8                        | 11.64                                        | 3.63                   |
| ν C-H asym. str. | 3019.6                        | 8.86                                         | –                      |

<sup>a</sup> Measured at ambient pressure and room temperature.**Table S3** Pressure dependence of the selected Raman modes of TMAB on compression.

| Assignment       | Frequency (cm <sup>-1</sup> ) | dν/dP (cm <sup>-1</sup> ·GPa <sup>-1</sup> ) |                        |
|------------------|-------------------------------|----------------------------------------------|------------------------|
|                  |                               | Phase I<br>(0–8.9 GPa)                       | Phase II<br>(>8.9 GPa) |
| ν 1              | 352.4                         | 7.28                                         | –                      |
| ν 2              | 442.2                         | 5.58                                         | –                      |
| ν 3              | 448.8                         | 5.28                                         | –                      |
| ν B-N str.       | 691.7                         | 8.14                                         | 5.27                   |
| ν B-N str.       | 729.2                         | 7.91                                         | –                      |
| ν B-H def.       | 1160.5                        | 2.19                                         | 3.02                   |
| ν B-H str.       | 2374.0                        | 10.50                                        | –                      |
| ν C-H str.       | 2930.0                        | 7.09                                         | 3.68                   |
| ν C-H str.       | 2958.4                        | 5.91                                         | –                      |
| ν C-H asym. str. | 3008.5                        | 7.39                                         | 6.53                   |

**Table S4** Cell parameters ( $a$ ,  $b$ ,  $c$  in Å;  $\alpha$ ,  $\beta$ ,  $\gamma$  in degrees) and Wyckoff positions for the unit cells of the top-ranked candidate structures of TMAB optimized at ambient pressure.

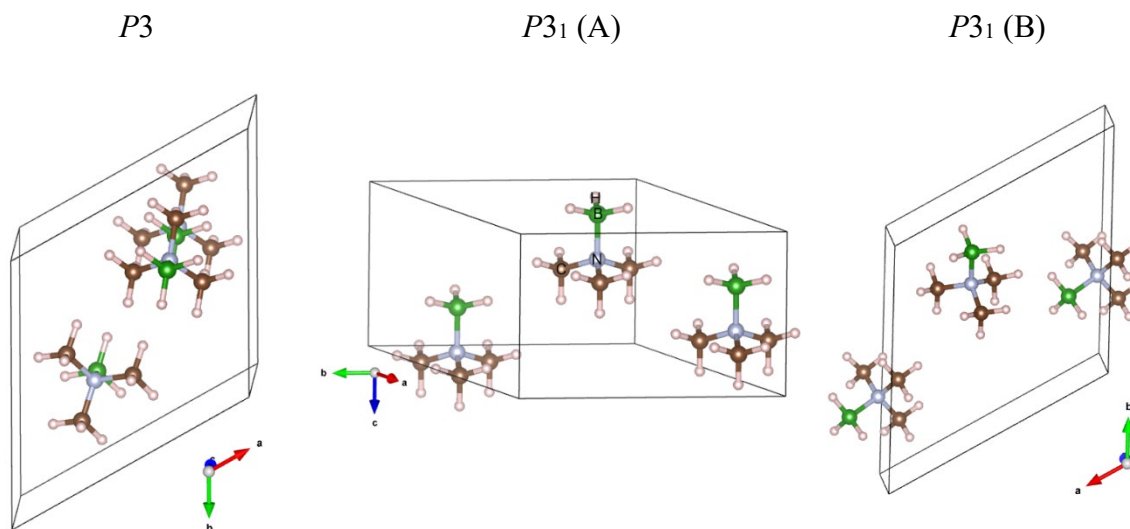

| $a, b, c$               | 9.577  | 9.577  | 5.833   |
|-------------------------|--------|--------|---------|
| $\alpha, \beta, \gamma$ | 90.000 | 90.000 | 120.000 |
| H(3 <i>d</i> )          | 0.9654 | 1.2008 | 0.7475  |
| H(3 <i>d</i> )          | 0.7847 | 1.0098 | 0.7553  |
| H(3 <i>d</i> )          | 0.9056 | 1.0733 | 0.4988  |
| H(3 <i>d</i> )          | 1.0590 | 1.1402 | 1.1136  |
| H(3 <i>d</i> )          | 1.2857 | 0.7833 | 0.1897  |
| H(3 <i>d</i> )          | 1.3634 | 0.9004 | 0.4482  |
| H(3 <i>d</i> )          | 1.1595 | 0.7399 | 0.4376  |
| H(3 <i>d</i> )          | 1.4304 | 0.8037 | 0.8045  |
| H(3 <i>d</i> )          | 0.5133 | 0.3162 | 1.3302  |
| H(3 <i>d</i> )          | 0.4129 | 0.1923 | 1.0858  |
| H(3 <i>d</i> )          | 0.4906 | 0.4044 | 1.0697  |
| H(3 <i>d</i> )          | 0.5568 | 0.2022 | 0.7152  |
| C(3 <i>d</i> )          | 0.9076 | 1.0760 | 0.6871  |
| C(3 <i>d</i> )          | 1.2822 | 0.7804 | 0.3779  |
| C(3 <i>d</i> )          | 0.5103 | 0.3101 | 1.1421  |
| B(3 <i>d</i> )          | 1.0000 | 1.0000 | 1.0522  |
| B(3 <i>d</i> )          | 1.3333 | 0.6667 | 0.7435  |
| B(3 <i>d</i> )          | 0.6667 | 0.3333 | 0.7764  |
| N(3 <i>d</i> )          | 1.0000 | 1.0000 | 0.7748  |
| N(3 <i>d</i> )          | 1.3333 | 0.6667 | 0.4657  |
| N(3 <i>d</i> )          | 0.6667 | 0.3333 | 1.0540  |

| $a, b, c$               | 9.405  | 9.405  | 5.938   |
|-------------------------|--------|--------|---------|
| $\alpha, \beta, \gamma$ | 90.000 | 90.000 | 120.000 |
| H(3 <i>a</i> )          | 0.5680 | 0.3559 | 0.4001  |
| H(3 <i>a</i> )          | 0.1213 | 0.0988 | 0.4001  |
| H(3 <i>a</i> )          | 0.3109 | 0.5453 | 0.4002  |
| H(3 <i>a</i> )          | 0.5676 | 0.5457 | 0.4001  |
| H(3 <i>a</i> )          | 0.1210 | 0.0990 | 0.3999  |
| H(3 <i>a</i> )          | 0.3114 | 0.0990 | 0.3999  |
| H(3 <i>a</i> )          | 0.5043 | 0.4189 | 0.6477  |
| H(3 <i>a</i> )          | 0.2481 | 0.1623 | 0.6477  |
| H(3 <i>a</i> )          | 0.2475 | 0.4184 | 0.6477  |
| H(3 <i>a</i> )          | 0.4053 | 0.4768 | 0.0434  |
| H(3 <i>a</i> )          | 0.4050 | 0.2614 | 0.0434  |
| H(3 <i>a</i> )          | 0.1899 | 0.2617 | 0.0433  |
| B(3 <i>a</i> )          | 0.3334 | 0.3333 | 0.1033  |
| C(3 <i>a</i> )          | 0.5050 | 0.4193 | 0.4628  |
| C(3 <i>a</i> )          | 0.2473 | 0.4189 | 0.4627  |
| C(3 <i>a</i> )          | 0.2477 | 0.1617 | 0.4628  |
| N(3 <i>a</i> )          | 0.3333 | 0.3333 | 0.3760  |

| $a, b, c$               | 10.298 | 10.298 | 5.775   |
|-------------------------|--------|--------|---------|
| $\alpha, \beta, \gamma$ | 90.000 | 90.000 | 120.000 |
| H(3 <i>a</i> )          | 0.5207 | 0.5236 | 0.2547  |
| H(3 <i>a</i> )          | 0.4224 | 0.5979 | 0.0982  |
| H(3 <i>a</i> )          | 0.5657 | 0.7136 | 0.3000  |
| H(3 <i>a</i> )          | 0.6852 | 0.5902 | -0.3227 |
| H(3 <i>a</i> )          | 0.4911 | 0.5169 | -0.2559 |
| H(3 <i>a</i> )          | 0.5990 | 0.4551 | -0.0939 |
| H(3 <i>a</i> )          | 0.8240 | 0.8128 | 0.2058  |
| H(3 <i>a</i> )          | 0.8776 | 0.7606 | -0.0554 |
| H(3 <i>a</i> )          | 0.7916 | 0.6259 | 0.1726  |
| H(3 <i>a</i> )          | 0.5232 | 0.7737 | -0.2245 |
| H(3 <i>a</i> )          | 0.7411 | 0.8520 | -0.3066 |
| H(3 <i>a</i> )          | 0.6871 | 0.9171 | -0.0081 |
| B(3 <i>a</i> )          | 0.6493 | 0.8174 | -0.1512 |
| C(3 <i>a</i> )          | 0.5308 | 0.6241 | 0.1714  |
| C(3 <i>a</i> )          | 0.6019 | 0.5508 | -0.1834 |
| C(3 <i>a</i> )          | 0.7939 | 0.7212 | 0.0830  |
| N(3 <i>a</i> )          | 0.6441 | 0.6761 | -0.0175 |

$P3_2$ 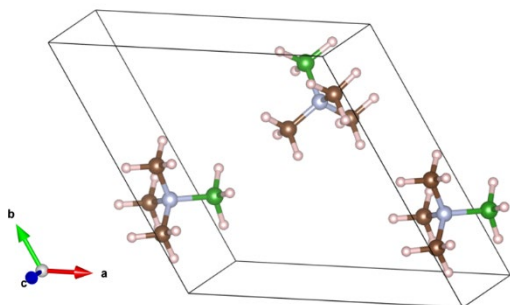

|                         |        |        |         |
|-------------------------|--------|--------|---------|
| <i>a, b, c</i>          | 10.249 | 10.249 | 5.775   |
| $\alpha, \beta, \gamma$ | 90.000 | 90.000 | 120.000 |
| H(3 <i>a</i> )          | 0.3356 | 1.1505 | 1.1052  |
| H(3 <i>a</i> )          | 0.1884 | 0.9604 | 1.1522  |
| H(3 <i>a</i> )          | 0.1624 | 1.0766 | 0.9481  |
| H(3 <i>a</i> )          | 0.4529 | 0.9079 | 0.8012  |
| H(3 <i>a</i> )          | 0.3468 | 0.8585 | 1.0626  |
| H(3 <i>a</i> )          | 0.5032 | 1.0453 | 1.0263  |
| H(3 <i>a</i> )          | 0.3129 | 1.1546 | 0.5944  |
| H(3 <i>a</i> )          | 0.4325 | 1.0786 | 0.5296  |
| H(3 <i>a</i> )          | 0.4833 | 1.2161 | 0.7564  |
| H(3 <i>a</i> )          | 0.1050 | 0.7536 | 0.8469  |
| H(3 <i>a</i> )          | 0.2246 | 0.8172 | 0.5483  |
| H(3 <i>a</i> )          | 0.0855 | 0.8975 | 0.6285  |
| B(3 <i>a</i> )          | 0.1676 | 0.8532 | 0.7028  |
| C(3 <i>a</i> )          | 0.2441 | 1.0495 | 1.0227  |
| C(3 <i>a</i> )          | 0.4091 | 0.9493 | 0.9381  |
| C(3 <i>a</i> )          | 0.3893 | 1.1198 | 0.6679  |
| N(3 <i>a</i> )          | 0.3050 | 0.9953 | 0.8355  |

 $R3$ 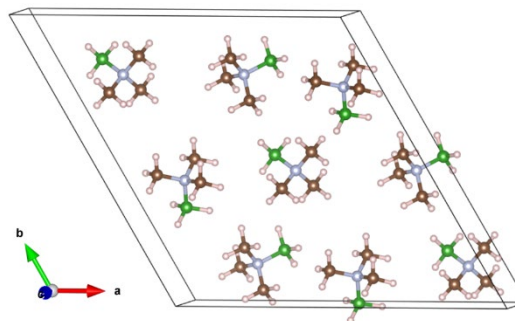

|                         |        |        |         |
|-------------------------|--------|--------|---------|
| <i>a, b, c</i>          | 17.344 | 17.344 | 5.753   |
| $\alpha, \beta, \gamma$ | 90.000 | 90.000 | 120.000 |
| H(9 <i>b</i> )          | 0.3032 | 0.5595 | 0.4717  |
| H(9 <i>b</i> )          | 0.2256 | 0.4950 | 0.2469  |
| H(9 <i>b</i> )          | 0.3186 | 0.4800 | 0.3092  |
| H(9 <i>b</i> )          | 0.1053 | 0.3920 | 0.7811  |
| H(9 <i>b</i> )          | 0.1055 | 0.4470 | 0.5178  |
| H(9 <i>b</i> )          | 0.1810 | 0.5086 | 0.7482  |
| H(9 <i>b</i> )          | 0.3178 | 0.4033 | 0.6671  |
| H(9 <i>b</i> )          | 0.2301 | 0.3730 | 0.8732  |
| H(9 <i>b</i> )          | 0.3094 | 0.4880 | 0.8233  |
| H(9 <i>b</i> )          | 0.1177 | 0.3337 | 0.2701  |
| H(9 <i>b</i> )          | 0.1181 | 0.2724 | 0.5689  |
| H(9 <i>b</i> )          | 0.2215 | 0.3156 | 0.3457  |
| B(9 <i>b</i> )          | 0.1631 | 0.3278 | 0.4229  |
| C(9 <i>b</i> )          | 0.2691 | 0.4944 | 0.3841  |
| C(9 <i>b</i> )          | 0.1470 | 0.4442 | 0.6573  |
| C(9 <i>b</i> )          | 0.2716 | 0.4220 | 0.7419  |
| N(9 <i>b</i> )          | 0.2134 | 0.4237 | 0.5542  |
